# Supplementary material for: School-Based Fluoride Mouth-Rinse Program Dissemination Associated With Decreasing Dental Caries Inequalities Between Japanese Prefectures: An Ecological Study
Source: PubMed Central journal article supplement (PMC5083319; doi:10.2188/jea.je20150255), 2016-11-05
Supplement: je-26-563-s001.pdf [file je-26-563-s001.pdf]

**eFigure 1.** Timeline of surveys from which variables were obtained

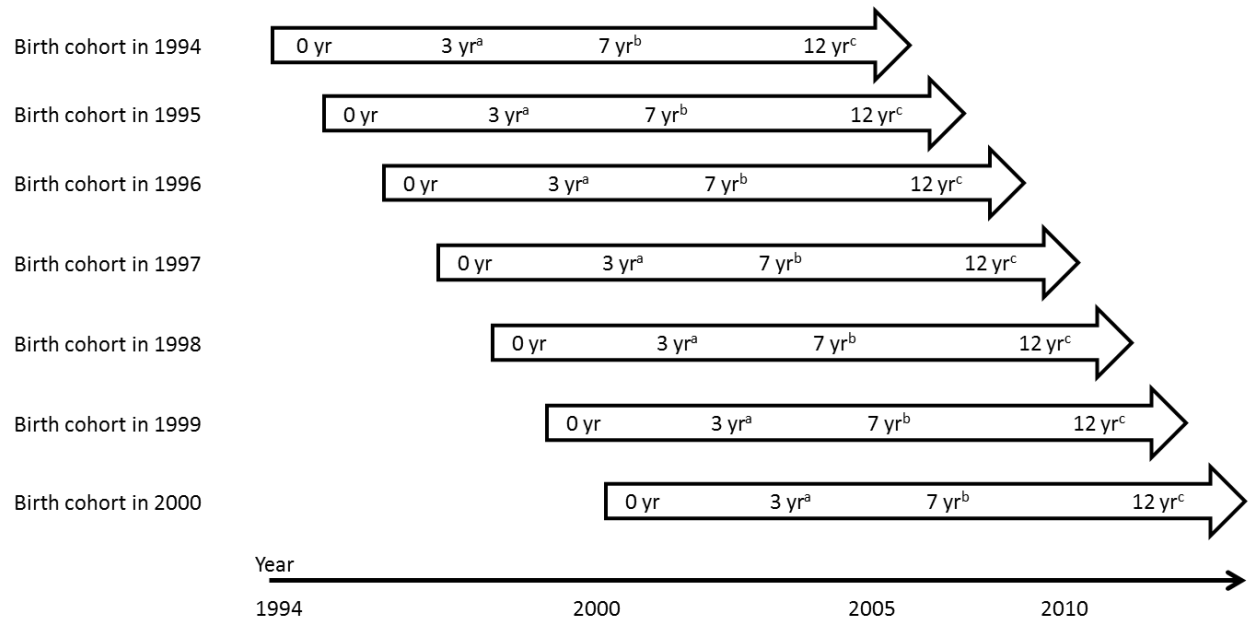

yr, years old.

All variables were aggregated to prefecture-level.

<sup>a</sup> Decayed, missing, or filled primary teeth were obtained.

<sup>b</sup> Proportion of children who receive school-based fluoride mouth-rinse programs, average number of times buying fluoride toothpaste, average annual income, average sugar consumption, and dentist density were obtained.

<sup>c</sup> Decayed, missing, or filled permanent teeth were obtained.
