# Supplementary material for: School-Based Fluoride Mouth-Rinse Program Dissemination Associated With Decreasing Dental Caries Inequalities Between Japanese Prefectures: An Ecological Study
Source: PubMed Central journal article supplement (PMC5083319; doi:10.2188/jea.je20150255), 2016-11-05
Supplement: je-26-563-s003.pdf [file je-26-563-s003.pdf]

**eTable 2.** Associations between the number of decayed, missing, and filled primary teeth at 3 years old and each explanatory variable, stratified by birth year

| Birth year                                   | Spearman's rho |          |          |          |          |          |          |
|----------------------------------------------|----------------|----------|----------|----------|----------|----------|----------|
|                                              | 1994           | 1995     | 1996     | 1997     | 1998     | 1999     | 2000     |
| Fluoride toothpaste consumption <sup>a</sup> | -0.17          | 0.15     | -0.08    | -0.06    | 0.04     | 0.15     | 0.01     |
| Income, 10,000 USD <sup>b</sup>              | -0.65***       | -0.63*** | -0.59*** | -0.65*** | -0.67*** | -0.69*** | -0.60*** |
| Sugar consumption, kg <sup>c</sup>           | 0.09           | 0.12     | 0.02     | 0.04     | 0.29*    | 0.40**   | 0.37*    |
| Dentist density <sup>d</sup>                 | -0.26          | -0.30*   | -0.27    | -0.25    | -0.24    | -0.26    | -0.28    |
| S-FMR utilization, % <sup>e</sup>            | 0.19           | 0.10     | 0.13     | 0.12     | 0.08     | 0.15     | 0.06     |

S-FMR, school-based fluoride mouth-rinse program.

\* p<0.05

\*\* p<0.01

\*\*\* p<0.001

<sup>a</sup> Average number of times buying fluoride toothpaste per year in each prefecture

<sup>b</sup> Average annual income in each prefecture (1 USD = 100 JPY)

<sup>c</sup> Average sugar consumption per capita in each prefecture

<sup>d</sup> Number of dentists per 100,000 residents in each prefecture

<sup>e</sup> Proportion of children who receive S-FMR in each prefecture
